# Supplementary material for: Efficacy of Marker-Based Motion Capture for Respiratory Cycle Measurement: A Comparison with Spirometry
Source: MDPI journal article supplement (doi:10.3390/s23249736), 2023-12-10
Supplement: s1 [file s1]

**Table S1.** Averaged spirometry BR, T<sub>ins</sub> and T<sub>exp</sub> of 25 participants (without one) and one participant (#16) with reduced Tiffno index, in sec.

| №      | Sitting       |                  |                   | Standing      |                   |                   | Supine        |                  |                   |
|--------|---------------|------------------|-------------------|---------------|-------------------|-------------------|---------------|------------------|-------------------|
|        | BR            | T <sub>ins</sub> | T <sub>exp</sub>  | BR            | T <sub>ins</sub>  | T <sub>exp</sub>  | BR            | T <sub>ins</sub> | T <sub>exp</sub>  |
| N = 25 | 14.6 ±<br>3.4 | 2.27 ±<br>0.55   | 2.07<br>±<br>0.46 | 15.3<br>± 3.6 | 2.12<br>±<br>0.55 | 1.93<br>±<br>0.46 | 15.3 ±<br>4.1 | 2.26 ±<br>0.63   | 2.01<br>±<br>0.48 |
| #16    | 11.4          | 2.83             | 2.57              | 12.6          | 2.43              | 2.46              | 10.2          | 2.98             | 2.72              |
